# Supplementary material
Source: PubMed Central journal article supplement (PMC5698652)
Supplement: rspb20171841supp2.pdf [file rspb20171841supp2.pdf]

**Table S2.**

Results of jackknife test to test model reliability from <25 samples. Taxon, number of QDSs occupied (*N*), test statistic (*D*), and *P* value (*P*).

| Taxon                                                  | <i>N</i> | <i>D</i> | <i>P</i> |
|--------------------------------------------------------|----------|----------|----------|
| <i>Babiana curviscapa</i>                              | 19       | 0.789    | <0.001   |
| <i>Babiana dregei</i>                                  | 13       | 0.692    | <0.001   |
| <i>Babiana tubulosa</i>                                | 11       | 0.818    | <0.001   |
| <i>Brownleea macroceras</i>                            | 24       | 0.917    | <0.001   |
| <i>Ceratandra bicolor</i>                              | 18       | 0.824    | <0.001   |
| <i>Ceratandra harveyana</i>                            | 6        | 0.833    | <0.001   |
| <i>Corycium deflexum</i>                               | 12       | 0.667    | <0.001   |
| <i>Disa draconis</i>                                   | 8        | 0.875    | <0.001   |
| <i>Disa pulchra</i>                                    | 25       | 0.840    | <0.001   |
| <i>Disperis bolusiana</i> subsp. <i>macrocorys</i>     | 6        | 0.667    | <0.001   |
| <i>Disperis circumflexa</i> subsp. <i>aemula</i>       | 9        | 0.667    | <0.001   |
| <i>Disperis cucullata</i>                              | 17       | 0.889    | <0.001   |
| <i>Disperis purpurata</i> subsp. <i>purpurata</i>      | 24       | 0.833    | <0.001   |
| <i>Gladiolus angustus</i>                              | 14       | 0.923    | <0.001   |
| <i>Hesperantha grandiflora</i>                         | 19       | 0.895    | <0.001   |
| <i>Ixia paniculata</i>                                 | 20       | 0.684    | <0.001   |
| <i>Lapeirousia dolomitica</i> subsp. <i>dolomitica</i> | 15       | 0.824    | <0.001   |
| <i>Lapeirousia silenoides</i>                          | 25       | 0.880    | <0.001   |
| <i>Pelargonium incrassatum</i>                         | 22       | 0.900    | <0.001   |
| <i>Pterygodium hallii</i>                              | 22       | 0.773    | <0.001   |
| <i>Pterygodium pentherianum</i>                        | 10       | 0.700    | <0.001   |
| <i>Pterygodium schelpei</i>                            | 13       | 0.417    | <0.001   |

**Table S3.**

Model performance values based on True Skill Statistics (TSS) and Area under the Receiver Operator Curve (AUC) values for Maxent models that include pollinator distributions as an explanatory variable and those that do not.

| Taxon                                   | Pollinator type | TSS             |                    | AUC             |                    |
|-----------------------------------------|-----------------|-----------------|--------------------|-----------------|--------------------|
|                                         |                 | With pollinator | Without pollinator | With pollinator | Without pollinator |
| <i>Babiana curviscapa</i>               | fly             | 0.966           | 0.974              | 0.994           | 0.993              |
| <i>Babiana dregei</i>                   | fly             | 0.971           | 0.973              | 0.991           | 0.990              |
| <i>Babiana tubulosa</i>                 | fly             | 0.986           | 0.967              | 0.998           | 0.992              |
| <i>Brownleea macroceras</i>             | fly             | 0.935           | 0.946              | 0.993           | 0.993              |
| <i>Brunsvigia grandiflora</i>           | fly             | 0.853           | 0.834              | 0.955           | 0.951              |
| <i>Ceratandra atrata</i>                | bee             | 0.924           | 0.931              | 0.986           | 0.984              |
| <i>Ceratandra bicolor</i>               | bee             | 0.929           | 0.965              | 0.985           | 0.988              |
| <i>Ceratandra harveyana</i>             | bee             | 0.962           | 0.893              | 0.940           | 0.94               |
| <i>Corycium camosum</i>                 | bee             | 0.931           | 0.909              | 0.982           | 0.982              |
| <i>Corycium deflexum</i>                | bee             | 0.964           | 0.802              | 0.980           | 0.936              |
| <i>Disa draconis</i>                    | fly             | 0.998           | 0.977              | 0.999           | 0.992              |
| <i>Disa pulchra</i>                     | fly             | 0.872           | 0.864              | 0.968           | 0.967              |
| <i>Disperis bolusiana</i>               | bee             | 0.991           | 0.962              | 0.979           | 0.985              |
| <i>Disperis circumflexa aemula</i>      | bee             | 0.935           | 0.883              | 0.977           | 0.961              |
| <i>Disperis circumflexa circumflexa</i> | bee             | 0.975           | 0.911              | 0.996           | 0.986              |
| <i>Disperis cucullata</i>               | bee             | 0.967           | 0.877              | 0.976           | 0.962              |
| <i>Disperis purpurata</i>               | bee             | 0.944           | 0.967              | 0.984           | 0.978              |
| <i>Disperis villosa</i>                 | bee             | 0.964           | 0.900              | 0.987           | 0.981              |
| <i>Gladiolus angustus</i>               | fly             | 0.979           | 0.854              | 0.970           | 0.948              |
| <i>Hesperantha grandiflora</i>          | fly             | 0.914           | 0.916              | 0.988           | 0.986              |
| <i>Ixia paniculata</i>                  | fly             | 0.953           | 0.883              | 0.990           | 0.981              |
| <i>Lapeirousia dolomitica</i>           | fly             | 0.849           | 0.889              | 0.945           | 0.948              |
| <i>Lapeirousia silenoides</i>           | fly             | 0.974           | 0.955              | 0.994           | 0.990              |
| <i>Pelargonium incrassatum</i>          | fly             | 0.968           | 0.939              | 0.972           | 0.975              |
| <i>Pelargonium longicaule</i>           | fly             | 0.898           | 0.888              | 0.969           | 0.966              |
| <i>Pterygodium hallii</i>               | bee             | 0.896           | 0.937              | 0.985           | 0.978              |
| <i>Pterygodium pentheranium</i>         | bee             | 0.959           | 0.892              | 0.978           | 0.960              |
| <i>Pterygodium schelpei</i>             | bee             | 0.917           | 0.882              | 0.966           | 0.965              |

|                                     |     |       |       |       |       |
|-------------------------------------|-----|-------|-------|-------|-------|
| <i>Watsonia densiflora</i>          | fly | 0.868 | 0.864 | 0.965 | 0.962 |
| <i>Watsonia lepida</i>              | fly | 0.896 | 0.896 | 0.982 | 0.981 |
| <i>Watsonia pulchra</i>             | fly | 0.871 | 0.862 | 0.968 | 0.963 |
| <i>Zaluzjanskia<br/>microsiphon</i> | fly | 0.906 | 0.917 | 0.986 | 0.986 |

---
