# Supplementary material
Source: PubMed Central journal article supplement (PMC5698652)
Supplement: rspb20171841supp4.pdf [file rspb20171841supp4.pdf]

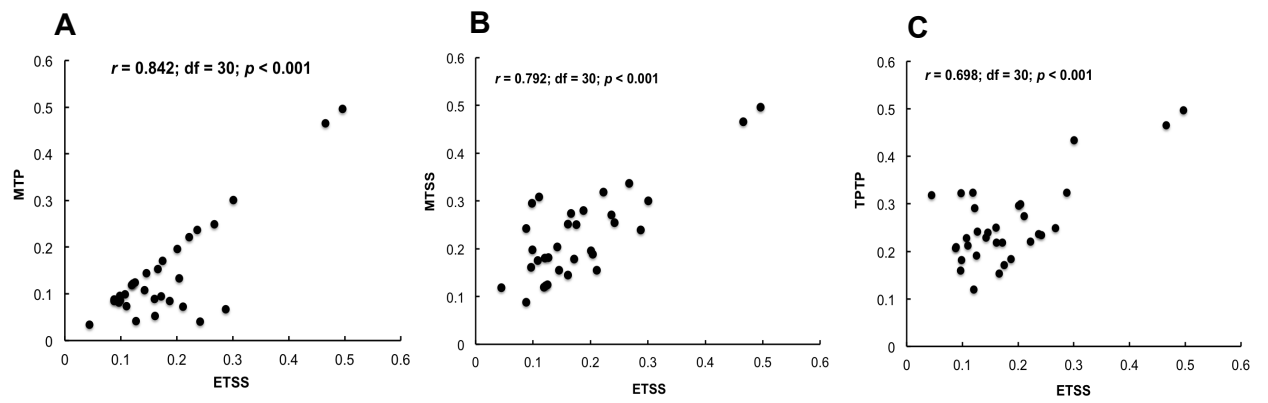

**Fig. S1.**

Positive correlations between ETSS and (A) MTP, (B) MTSS, and (C) TPTP based on the consensus of 50 Maxent models for the 32 plant taxa investigated in this study based on model outputs excluding pollinator distributions as explanatory variables.
